# Supplementary material for: Autoimmune disease-associated non-Hodgkin’s lymphoma—a large retrospective study from China
Source: Springer Nature journal article supplement (doi:10.1007/s00277-018-3515-2), 2018-10-29
Supplement: MOESM1 [file 16234006]

**Table S1** First-line chemotherapy regimens for patients with AD-associated NHL

| Chemotherapy regimens | No. of patients (%) |
| --- | --- |
| CHOP±R | 75 (64.7) |
| CHOP+MTX±R | 7 (6.0) |
| CHOEP±R | 6 (5.2) |
| EPOCH±R | 3 (2.6) |
| CVP±R | 10 (8.6) |
| GDPML | 5 (4.3) |
| Rituximab monotherapy | 5 (4.3) |
| R-HyperCVAD | 1 (0.9) |
| R-CHOP alternating with R-MA | 1 (0.9) |
| Rituximab + lenalidomide | 1 (0.9) |
| SMILE | 1 (0.9) |
| Bortezomib+CHOP | 1 (0.9) |

R: rituximab; CHOP: cyclophosphamide, doxorubicin, vincristine, prednisone; MTX: methatrexate; CHOEP: cyclophosphamide, doxorubicin, vincristine, etoposide, prednisone; EPOCH: etoposide, doxorubicin and vincristine administered by 96-hour continuous infusion, cyclophosphamide and prednisone; CVP: cyclophosphamide, vincristine, prednisone; GDPML: gemcitabine, cisplatin, dexamethsone, methotrexate and pegasterase; HyperCVAD: cyclophosphamide, vincristine, doxorubicin, dexamethasone; MA: methatrexate and cytarabine; SMILE: dexamethasone, methatrexate, [ifosfamide](http://www.baidu.com/link?url=FJrlK1tPrAjkjDxOa7kqrr3ST7BQODxzQiIwe_47CvSF-CFUabbKDMKNL_cd6r9zcf9T1AVBmqR6HF3qsM9xLVgAUJ-eDGBaMwnGXv_Hzk7), pegaspargase and etoposide.
